# Supplementary figures and images for: Identification of novel molecular subtypes and a signature to predict prognosis and therapeutic response based on cuproptosis-related genes in prostate cancer
Source: Frontiers journal article supplement (doi:10.3389/fonc.2023.1162653), 2023-05-02

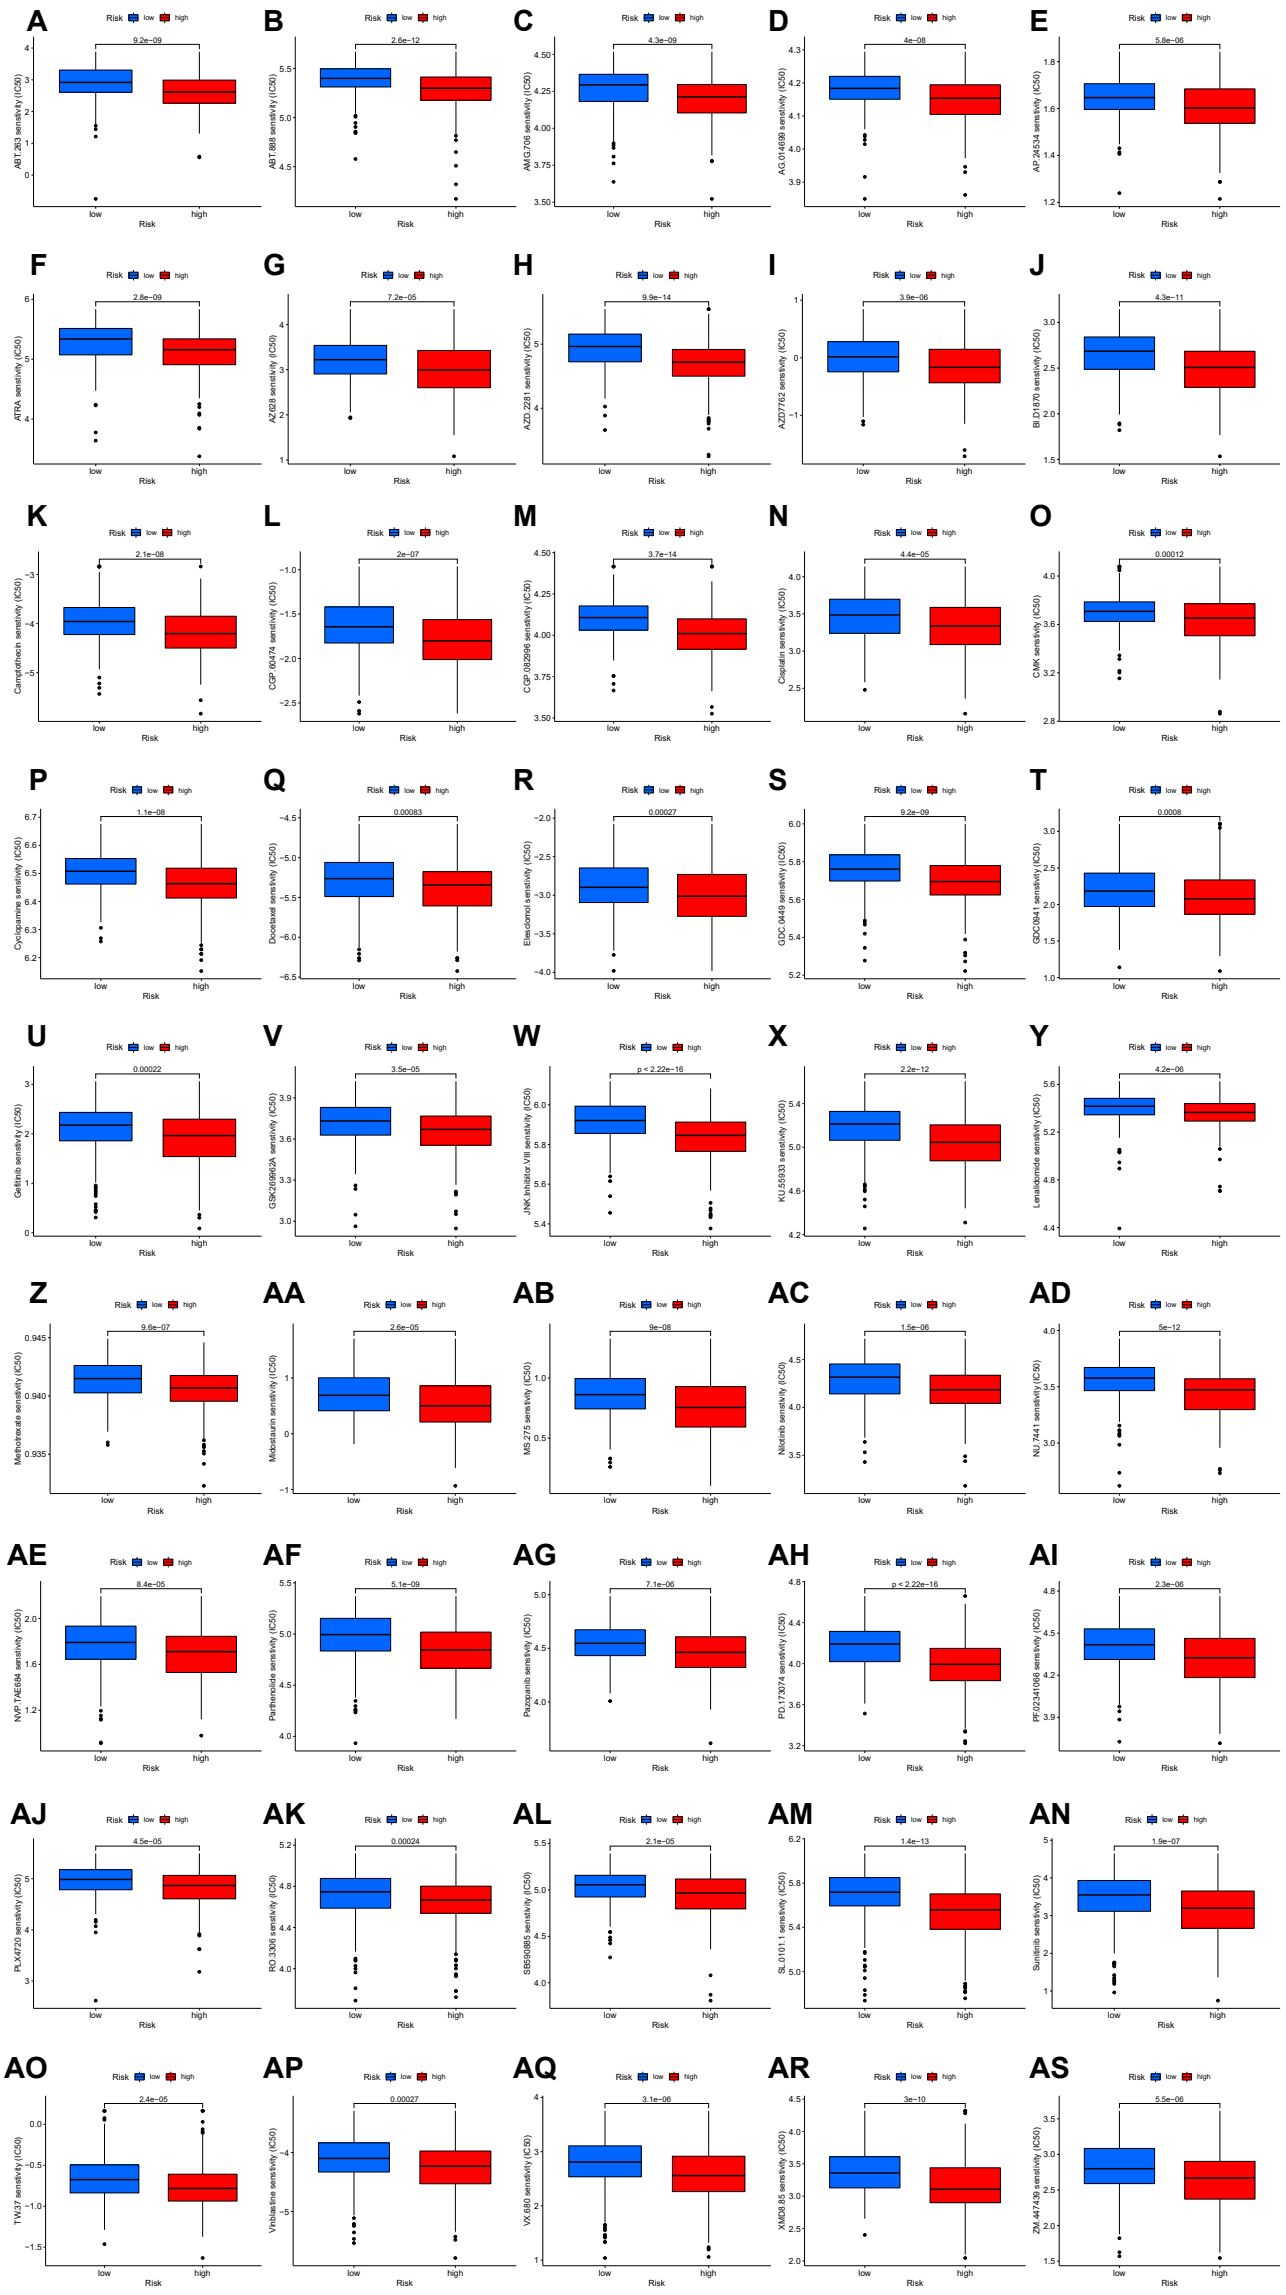

Supplement: Data_Sheet_2.ZIP [file Data_Sheet_2.ZIP]

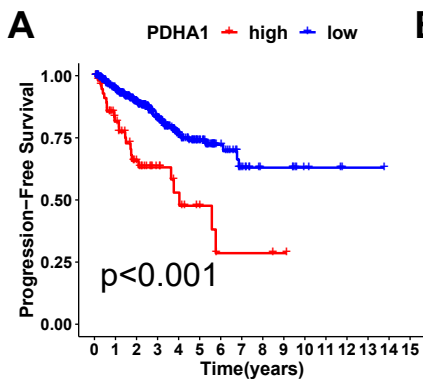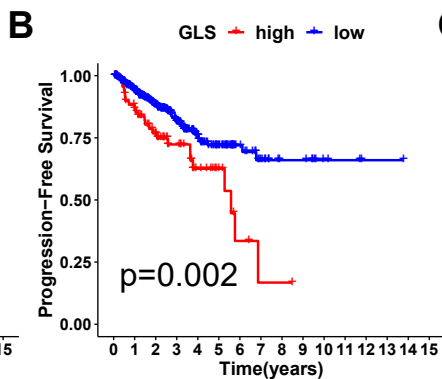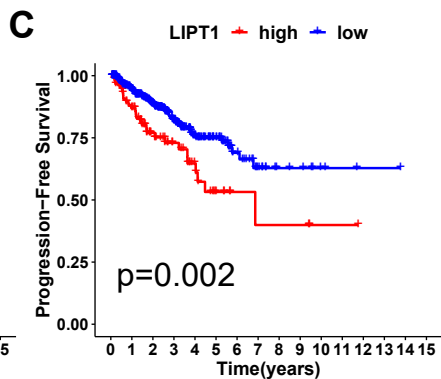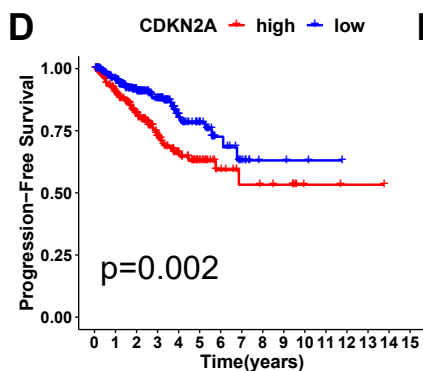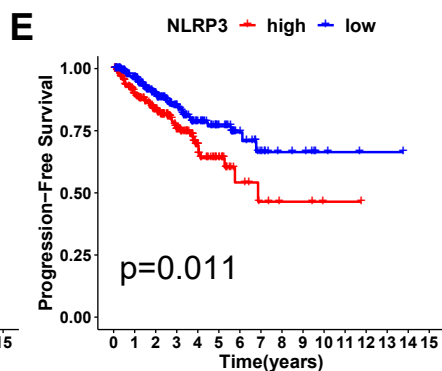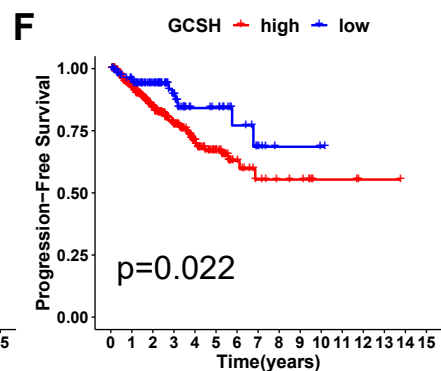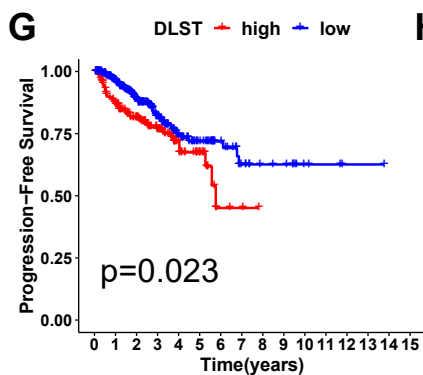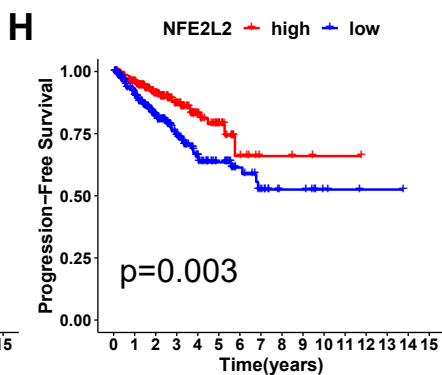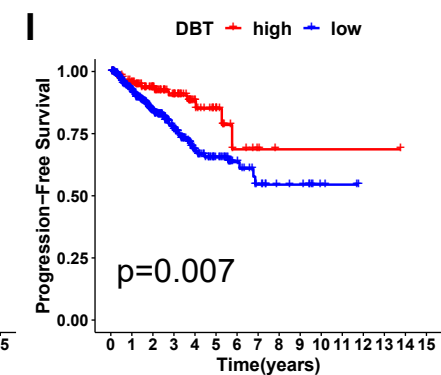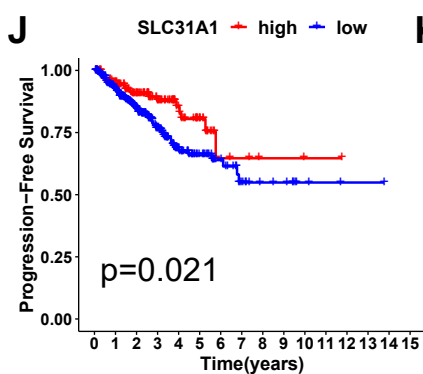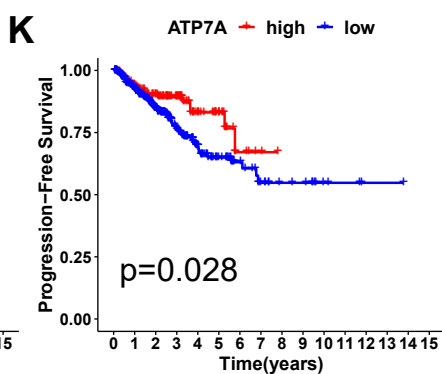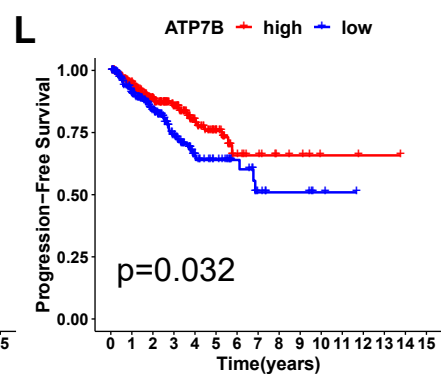

Supplement: Data_Sheet_2.ZIP [file Data_Sheet_2.ZIP]

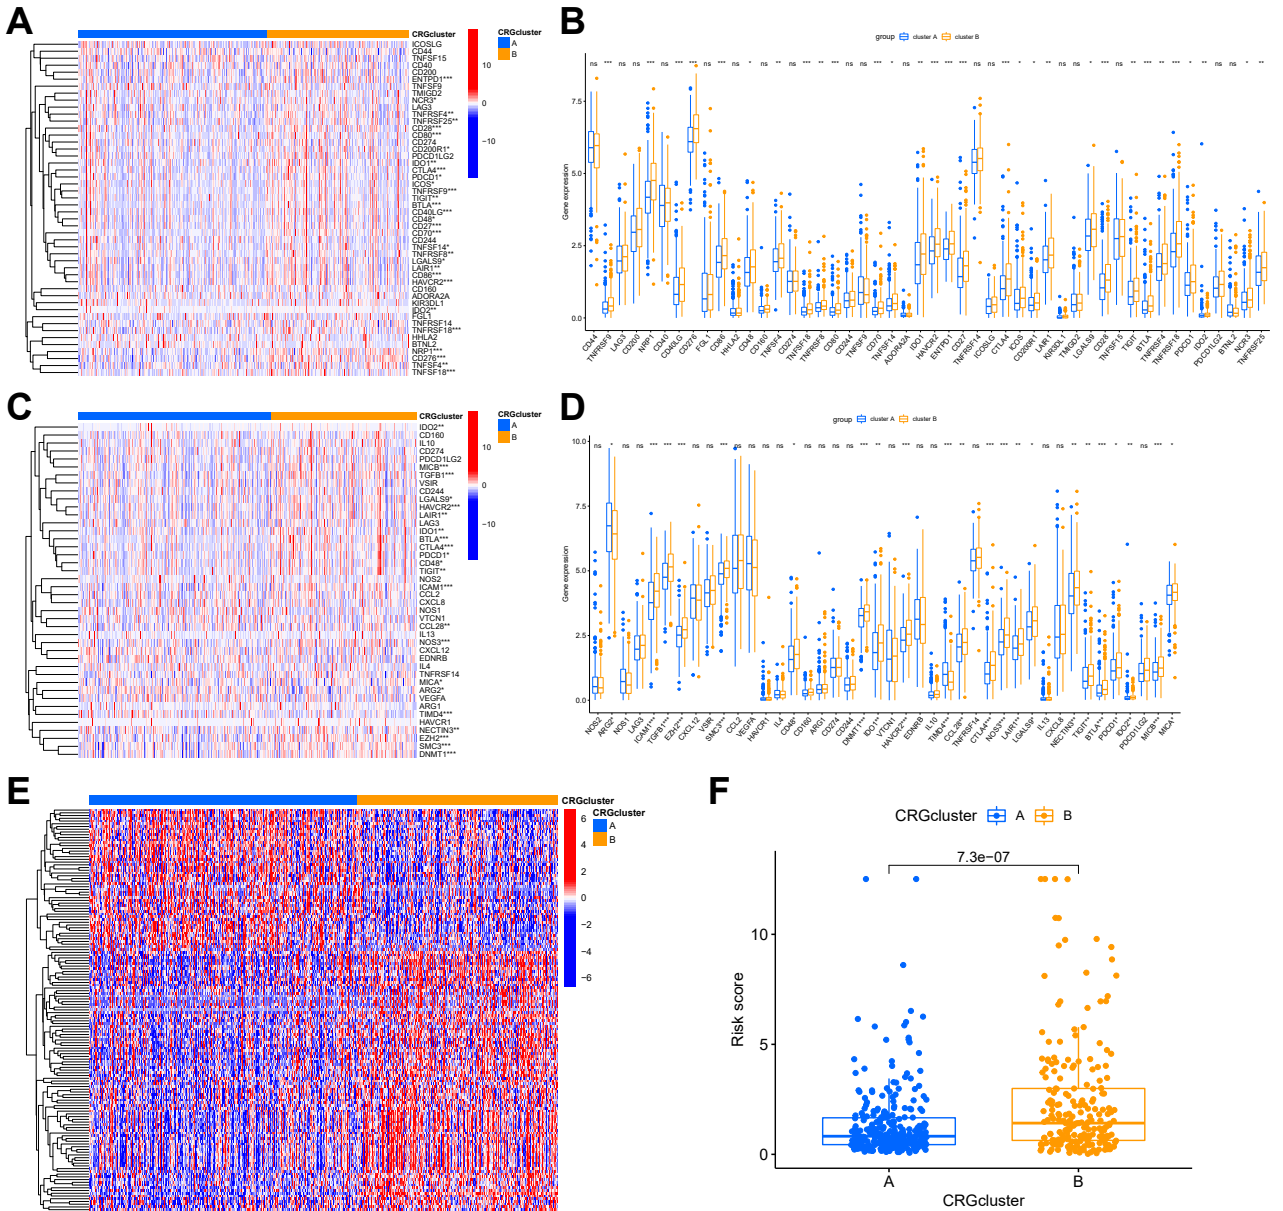

Supplement: Data_Sheet_2.ZIP [file Data_Sheet_2.ZIP]

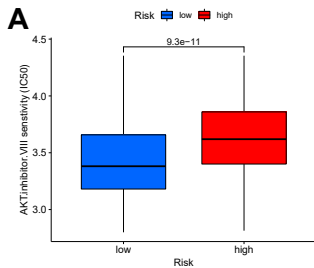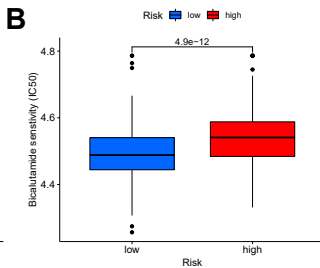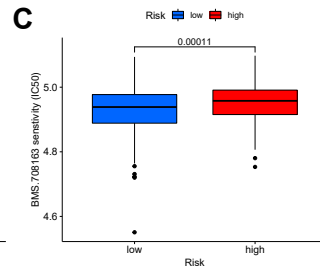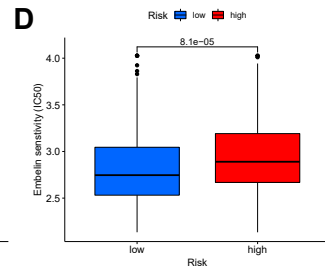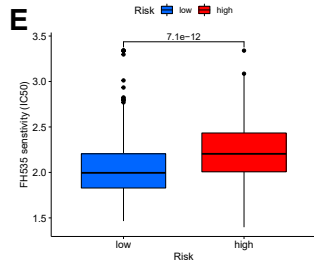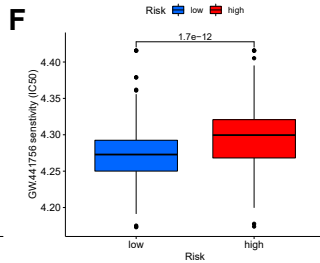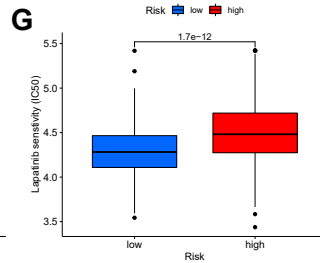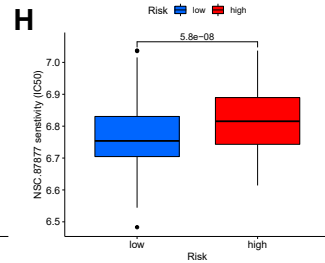

Supplement: Data_Sheet_2.ZIP [file Data_Sheet_2.ZIP]
